# Supplementary material
Source: publisher figshare collection journal article supplement (https://acs.figshare.com/ndownloader/files/13308287)
Supplement: Supplementary file 1 [file 13308287]

## **Supporting Information**

### **An Approach Using Oxidative Coupling of Methane for Converting Biogas and Acid Natural Gas into High-Calorific Fuels**

Sergey Sokolov<sup>a</sup>, Dominik Seeburg<sup>a</sup>, Sebastian Wohlrab<sup>a</sup>, Markus Friedel<sup>b</sup>, Jörg Nitzsche<sup>b</sup>, Evgenii V. Kondratenko<sup>a,\*</sup>

<sup>a</sup>Leibniz-Institut für Katalyse e.V., Albert-Einstein-Straße 29a, D-18059 Rostock, Germany

<sup>b</sup>DBI - Gastechnologisches Institut gGmbH Freiberg, Halsbrücker Straße 34, D-09599 Freiberg, Germany

Corresponding author: [\\*evgenii.kondratenko@catalysis.de](mailto:*evgenii.kondratenko@catalysis.de)

## **Content**

|                                          |           |
|------------------------------------------|-----------|
| <b>Catalyst preparation</b>              | <b>3</b>  |
| <b>Higher heating value calculations</b> | <b>4</b>  |
| <b>Table S1</b>                          | <b>6</b>  |
| <b>Figure S1</b>                         | <b>7</b>  |
| <b>Figure S2</b>                         | <b>8</b>  |
| <b>Figure S3</b>                         | <b>9</b>  |
| <b>Figure S4</b>                         | <b>10</b> |

### **Catalyst preparation**

$\text{La}_2\text{O}_3$  and  $\text{MgO}$  were used as host oxides. An incipient wetness impregnation method was applied for depositing an aqueous solution of two dopants to each host oxide at room temperature. The dopants were nitrates of lithium, cesium, barium, strontium, manganese or magnesium (in case of  $\text{La}_2\text{O}_3$  as host oxide). The impregnated materials were dried at 120 °C for 4 hours followed by their calcination in a muffle furnace in static air at 800 °C for 5 hours. Hereafter, they were pressed and then crushed to obtain particles of 0.25 - 0.45 mm.

## Higher heating value calculations

For calculating higher heating value (HHV) of gaseous mixtures formed in the OCM reaction over different catalysts from the database reported by Kondratenko et al.[E.V. Kondratenko, T. Peppel, D. Seeburg, V.A. Kondratenko, N. Kalevaru, A. Martin, S. Wohlrab, Catal. Sci. Tech. 7 (2017) 366-381], the below assumptions were made:

- i. water and oxygen are not present in the mixtures;
- ii.  $C_2H_4$  and  $C_2H_6$  are present in equal amounts or outlet mixtures contains either  $C_2H_4$  or  $C_2H_6$  (unfortunately, separate selectivity values for  $C_2H_4$  and  $C_2H_6$  are often not reported);
- iii.  $CO_2$  and  $CO$  are present in equal amounts or outlet mixtures contains either  $CO_2$  or  $CO$  (unfortunately, separate selectivity values for  $CO_2$  and  $CO$  are often not reported).

On the basis of (ii) and (iii), we calculated averaged higher heating values for  $C_2$  hydrocarbons and  $CO_x$  using equations S1 and S2 respectively. Equation S3 was used to calculate overall HHV.

$$HHV_{C_2} = (HHV_{C_2H_6} + HHV_{C_2H_4})/2 \quad (S1)$$

$$HHV_{CO_x} = (HHV_{CO_2} + HHV_{CO})/2 \quad (S2)$$

$$HHV = \chi_{CH_4} \times HHV_{CH_4} + \chi_{C_2} \times HHV_{C_2} + \chi_{CO_x} \times HHV_{CO_x} \quad (S3)$$

Where  $\chi_{CH_4}$ ,  $\chi_{C_2}$ ,  $\chi_{CO_x}$  are mole fractions of  $CH_4$ ,  $C_2$  hydrocarbons and  $CO_x$  respectively.

$$HHV_{C_2H_6} = 19.682 \text{ kW} \cdot \text{h} \cdot \text{m}^{-3}$$

$$HHV_{C_2H_4} = 17.756 \text{ kW} \cdot \text{h} \cdot \text{m}^{-3}$$

$$HHV_{CO_2} = 0 \text{ kW} \cdot \text{h} \cdot \text{m}^{-3}$$

$$HHV_{CO} = 3.537 \text{ kW} \cdot \text{h} \cdot \text{m}^{-3}$$

As previous studies did not report mole fractions of individual components as required for calculating HHV (equation S3), we calculated them from the reported values of  $C_2$  and  $CO_x$  selectivity as well as  $CH_4$  conversion as follows.

$$n_{CH_4} = n^0 \times (1 - X_{CH_4}) \quad (S4)$$

$$n_{C_2} = 0.5 \times n^0 \times S_{C_2} \times X_{CH_4} \quad (S5)$$

$$n_{CO_x} = n^0 \times S_{CO_x} \times X_{CH_4} = n^0 \times X_{CH_4} \times (1 - S_{C_2}) \quad (S6)$$

$$\chi_{CH_4} = \frac{n^0 \times (1 - X_{CH_4})}{n^0 \times (1 - X_{CH_4}) + 0.5 \times n^0 \times X_{CH_4} \times S_{C_2} + n^0 \times X_{CH_4} \times (1 - S_{C_2})} = \frac{1 - X_{CH_4}}{(1 - 0.5 \times X_{CH_4} \times S_{C_2})} \quad (S7)$$

$$\chi_{C_2} = \frac{0.5 \times n^0 \times X_{CH_4}}{n^0 \times (1 - X_{CH_4}) + 0.5 \times n^0 \times X_{CH_4} \times S_{C_2} + n^0 \times X_{CH_4} \times (1 - S_{C_2})} = \frac{0.5 \times X_{CH_4} \times S_{C_2}}{(1 - 0.5 \times X_{CH_4} \times S_{C_2})} \quad (S8)$$

$$\chi_{CO_x} = \frac{n^0 \times X_{CH_4} \times (1 - S_{C_2})}{n^0 \times (1 - X_{CH_4}) + 0.5 \times n^0 \times X_{CH_4} \times S_{C_2} + n^0 \times X_{CH_4} \times (1 - S_{C_2})} = \frac{X_{CH_4} \times (1 - S_{C_2})}{(1 - 0.5 \times X_{CH_4} \times S_{C_2})} \quad (S9)$$

Using equations S3-S9, equation S10 can be obtained. It shows the dependence of  $C_2$  selectivity on  $CH_4$  conversion to get a gas mixture with a certain HHV.

$$S_{C_2} = \frac{HHV - (1 - X_{CH_4}) \times HHV_{CH_4} - X_{CH_4} \times HHV_{CO_x}}{0.5 \times HHV \times X_{CH_4} + 0.5 \times X_{CH_4} \times HHV_{C_2} - X_{CH_4} \times HHV_{CO_x}} \quad (S10)$$

Where,  $n_i$ ,  $n^0$ ,  $X_{CH_4}$ ,  $S_{C_2}$ ,  $S_{CO_x}$  stand for the number of moles of an individual component ( $CH_4$ ,  $C_2$  hydrocarbons or  $CO_x$ ), the number of methane moles in the feed mixture, methane conversion,  $C_2$  selectivity and  $CO_x$  selectivity respectively.

If  $CO_2$  is present in the OCM feed, equation S10 is transformed to equation S11.

$$S_{C_2} = \frac{HHV(1+a) - (1 - X_{CH_4}) \times HHV_{CH_4} - X_{CH_4} \times HHV_{CO_x}}{0.5 \times HHV \times X_{CH_4} + 0.5 \times X_{CH_4} \times HHV_{C_2} - X_{CH_4} \times HHV_{CO_x}} \quad (S11)$$

Where  $a$  is the feed ratio of  $CO_2$  to  $CH_4$ .

Table S1 Catalyst composition and their performance in the OCM reaction at 800°C using a feed (40 vol% CH<sub>4</sub>) with the CH<sub>4</sub>/O<sub>2</sub> ratio of 2.

| Nr. | Catalysts                                                             | X(CH <sub>4</sub> )<br>/ % | Y(C <sub>2</sub> )<br>/ % | S(C <sub>2</sub> )<br>/ % | S(C <sub>3+</sub> )<br>/ % | S(CO <sub>x</sub> )<br>/ % | C <sub>2</sub> H <sub>6</sub> /<br>C <sub>2</sub> H <sub>4</sub> | CO/<br>CO <sub>2</sub> |
|-----|-----------------------------------------------------------------------|----------------------------|---------------------------|---------------------------|----------------------------|----------------------------|------------------------------------------------------------------|------------------------|
| 1   | Mn <sub>0.1</sub> Sr <sub>9.1</sub> La <sub>90.8</sub> O <sub>x</sub> | 22.8                       | 8.6                       | 37.5                      | n.m.                       | 60.5                       | 0.75                                                             | 0.12                   |
| 2   | Li <sub>0.1</sub> Sr <sub>9.1</sub> La <sub>90.8</sub> O <sub>x</sub> | 25.5                       | 11.3                      | 44.5                      | n.m.                       | 55.5                       | 0.64                                                             | 0.12                   |
| 3   | Mn <sub>0.1</sub> Ba <sub>1.0</sub> La <sub>98.9</sub> O <sub>x</sub> | 34.5                       | 11.8                      | 34.2                      | n.m.                       | 65.8                       | 0.93                                                             | 0.09                   |
| 4   | Mg <sub>8.3</sub> Sr <sub>8.3</sub> La <sub>83.3</sub> O <sub>x</sub> | 38.5                       | 14.8                      | 38.4                      | n.m.                       | 61.6                       | 0.64                                                             | 0.15                   |
| 5   | Mg <sub>9.1</sub> Ba <sub>0.9</sub> La <sub>90.1</sub> O <sub>x</sub> | 39.5                       | 16.6                      | 42.0                      | n.m.                       | 58.0                       | 0.66                                                             | 0.15                   |
| 6   | Ba <sub>8.3</sub> Sr <sub>8.3</sub> Mg <sub>83.3</sub> O <sub>x</sub> | 39.8                       | 17.4                      | 43.7                      | n.m.                       | 56.3                       | 0.58                                                             | 0.13                   |
| 7   | Cs <sub>8.3</sub> Sr <sub>8.3</sub> Mg <sub>83.3</sub> O <sub>x</sub> | 40.6                       | 17.6                      | 43.3                      | n.m.                       | 56.7                       | 0.57                                                             | 0.21                   |
| 8   | Mn-Na-WO <sub>x</sub> /SiO <sub>2</sub>                               | 48.0                       | 20.2                      | 42.0                      | 3.4                        | 54.6                       | 0.3                                                              | 0.04                   |

n.m. stands for not measured.

$$Y(C_2)=X(CH_4)*S(C_2)/100 \quad (12)$$

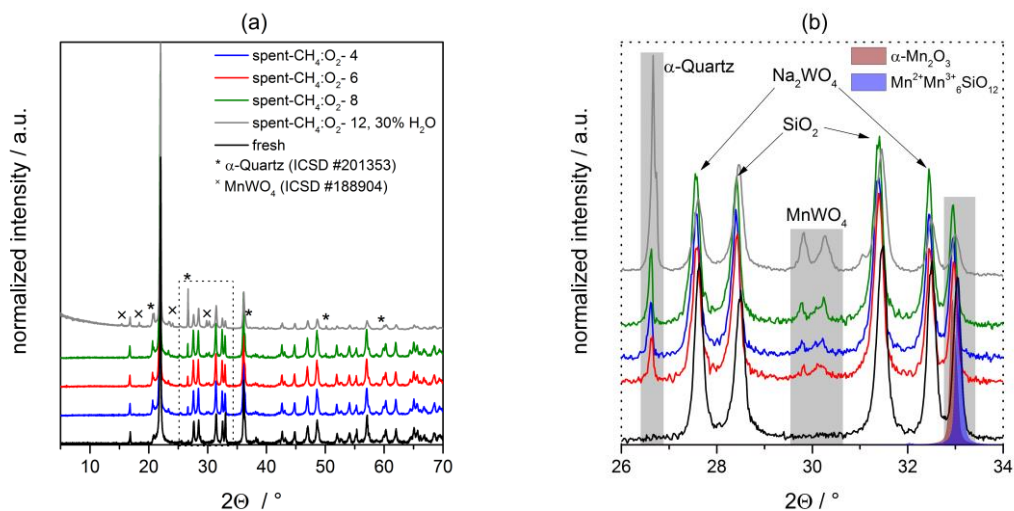

Figure S1 (a) X-ray diffractograms of fresh and spent (after the OCM reaction at 800°C using feeds with different  $\text{CH}_4/\text{O}_2$  ratios) Mn-Na- $\text{WO}_x/\text{SiO}_2$  and (b) magnification of the dashed box from (a) to identify structural changes after OCM reaction.

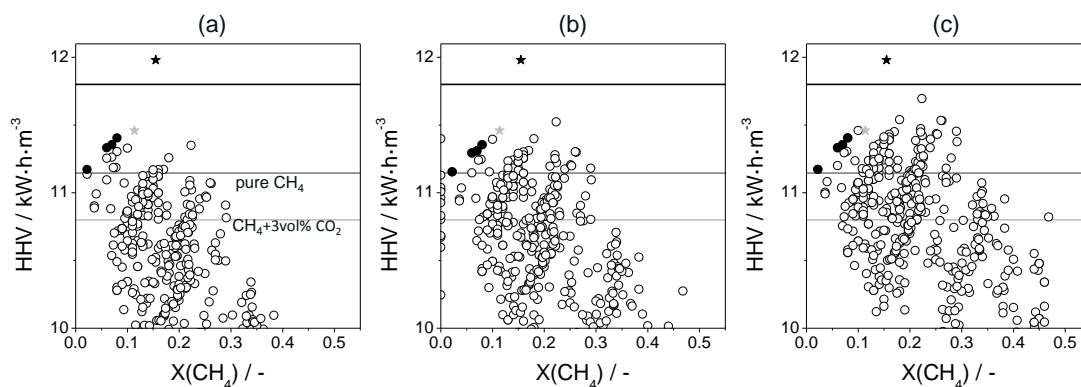

Figure S2 Higher heating value (HHV) of gas mixtures after the OCM reaction over different catalysts from the database reported by Kondratenko et al.[E.V. Kondratenko, T. Peppel, D. Seeburg, V.A. Kondratenko, N. Kalevaru, A. Martin, S. Wohlrab, Catal. Sci. Tech. 7 (2017) 366-381]. As separate selectivity values for CO<sub>2</sub>, CO, C<sub>2</sub>H<sub>6</sub> and C<sub>2</sub>H<sub>4</sub> have not always been reported in the previous studies it was assumed for calculations that (a) the outlet mixture consists of CH<sub>4</sub>, C<sub>2</sub>H<sub>4</sub> and CO<sub>2</sub>, (b) the outlet mixture consists of CH<sub>4</sub>, C<sub>2</sub>H<sub>4</sub>/C<sub>2</sub>H<sub>6</sub>=1 and CO/CO<sub>2</sub>=1, (c) the outlet mixture consists of CH<sub>4</sub>, C<sub>2</sub>H<sub>6</sub> and CO. The stars represent the performance after OCM (grey symbol) and after OCM combined with hydrogenation of carbon oxides (black symbol) as obtained in this study. The solid lines in this figure represent HHV of 10.7, 11.147, and 11.8 kW·h·m<sup>-3</sup> characteristic of biogas with 3 vol% CO<sub>2</sub>, pure CH<sub>4</sub> and the high calorific natural gas[Terry, W.; Nigel, B.; Martin, B.; Len, E.; Adam, J.; Antony, K.; Angus, P.; Gareth, D.; Andrew, M.; James, C.; James, W.; Michael, d. C.; Seda, F.; Natasha, A.; Sergej, D. Final Report, Gas Quality Harmonisation Cost Benefit Analysis; The European Commission by GL Noble Denton and Pöyry Management Consulting, 2012.], respectively.



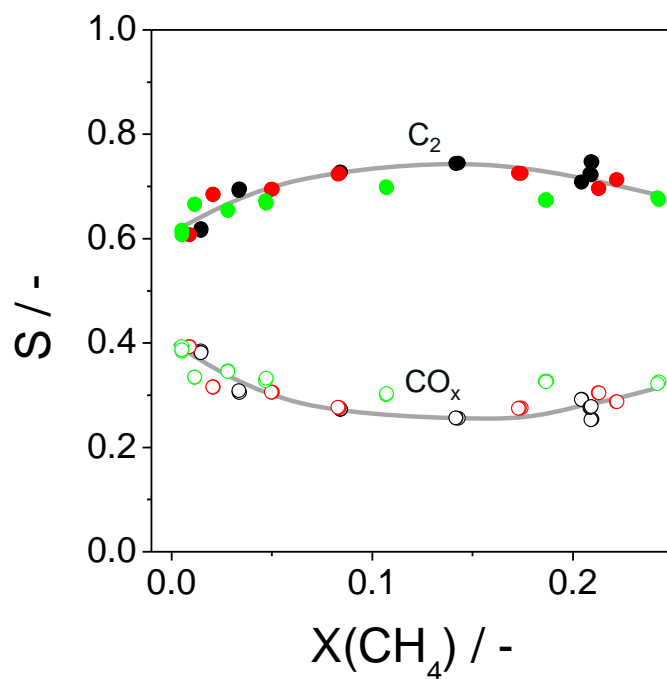

Figure S3 Effect of methane conversion on the selectivity ( $S$ ) to  $\text{C}_2$  hydrocarbons (closed symbols) and  $\text{CO}_x$  (open symbols) over  $\text{Mn-Na-WO}_x/\text{SiO}_2$  at  $800^\circ\text{C}$  using reaction feeds with 20 (green), 40 (red) or 70 (black) vol%  $\text{CH}_4$ . The  $\text{CH}_4/\text{O}_2$  ratio was 6.

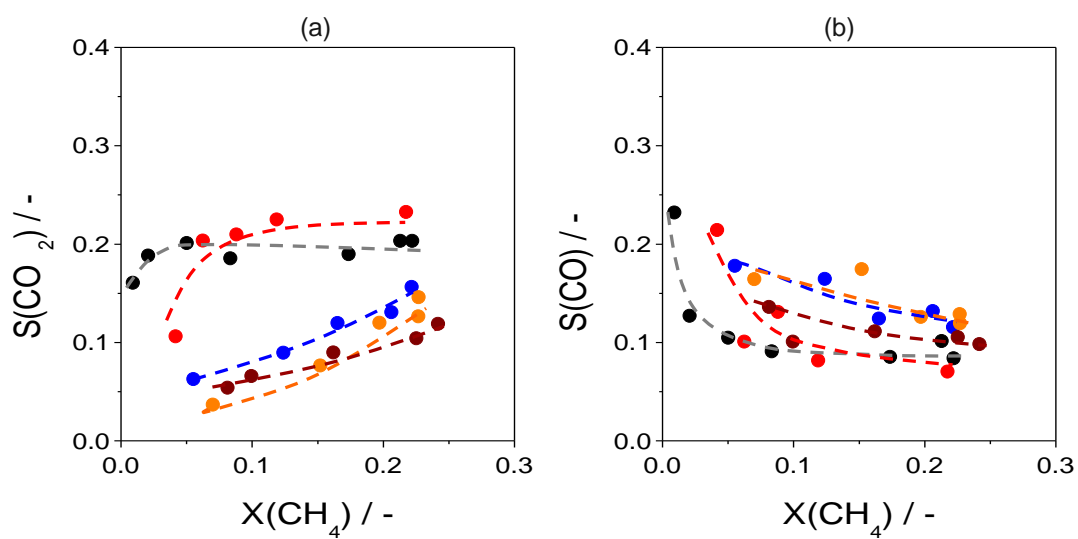

Figure S4 Effect of methane conversion on the selectivity to (a)  $\text{CO}_2$  and (b)  $\text{CO}$  over  $\text{Mn-Na-WO}_x/\text{SiO}_2$  at  $800^\circ\text{C}$  using a feed (40 vol%  $\text{CH}_4$ ) with the  $\text{CH}_4/\text{O}_2$  ratio of 6 and different amounts of co-fed water: ● 0, ● 2, ● 5, ● 15, ● 30 vol%.
